# Supplementary material for: A comparative genome analysis of Cercospora sojina with other members of the pathogen genus Mycosphaerella on different plant hosts
Source: PubMed Central journal article supplement — Genom Data. 2017 Jul 8;13:54–63. doi: 10.1016/j.gdata.2017.07.007 (PMC5508496; doi:10.1016/j.gdata.2017.07.007), 2017-07-08
Supplement: mmc5.pdf [file mmc5.pdf]

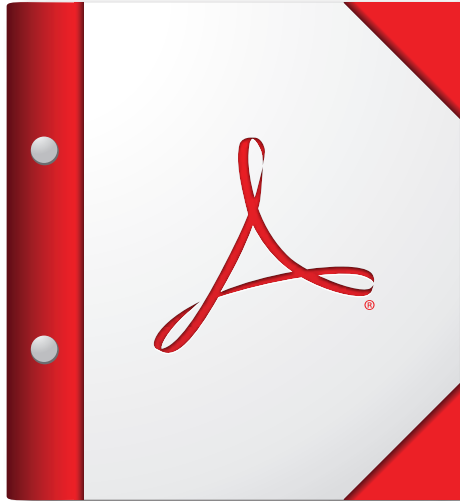

**For the best experience, open this PDF portfolio in  
Acrobat 9 or Adobe Reader 9, or later.**

[Get Adobe Reader Now!](#)
